# Supplementary material for: Study Conditions and University Students’ Mental Health during the Pandemic: Results of the COVID-19 German Student Well-Being Study (C19 GSWS)
Source: MDPI journal article supplement (doi:10.3390/ijerph20075286), 2023-03-28
Supplement: s1 [file s1]

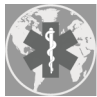

## Supplementary material

### S1: Formulas of the three regression models

#### Formula of the CES-D 8 model

$CES-D\ 8 = \beta_1 + \text{study conditions } X \beta_2 + \text{utilization of study conditions } X \beta_3 + \text{anyone to discuss intimate matters with } X \beta_4 + \text{age } X \beta_5 + \text{residency status in Germany } X \beta_6 + \text{living situation } X \beta_7 + \text{gender } X \beta_8 + \text{relationship status } X \beta_9 + \text{study programme } X \beta_{10} + \varepsilon$

#### Formula of the PHQ-2 model

$PHQ-2 = \beta_1 + \text{study conditions } X \beta_2 + \text{utilization of study conditions } X \beta_3 + \text{anyone to discuss intimate matters with } X \beta_4 + \text{age } X \beta_5 + \text{residency status in Germany } X \beta_6 + \text{living situation } X \beta_7 + \text{gender } X \beta_8 + \text{relationship status } X \beta_9 + \text{study programme } X \beta_{10} + \varepsilon$

#### Formula of the GAD-2 model

$GAD-2 = \beta_1 + \text{study conditions } X \beta_2 + \text{utilization of study conditions } X \beta_3 + \text{anyone to discuss intimate matters with } X \beta_4 + \text{age } X \beta_5 + \text{residency status in Germany } X \beta_6 + \text{living situation } X \beta_7 + \text{gender } X \beta_8 + \text{relationship status } X \beta_9 + \text{study programme } X \beta_{10} + \varepsilon$

**S2: Validity of method assumptions check for the three regression models**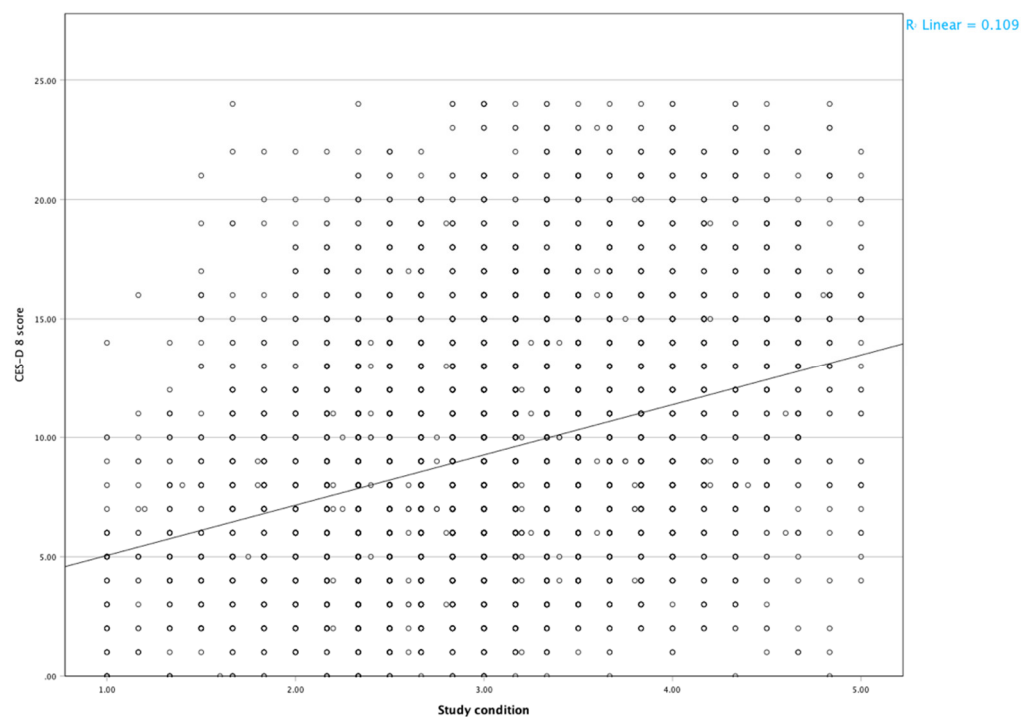

Figure S2.1: Linearity between the CES-D 8 score and study condition score

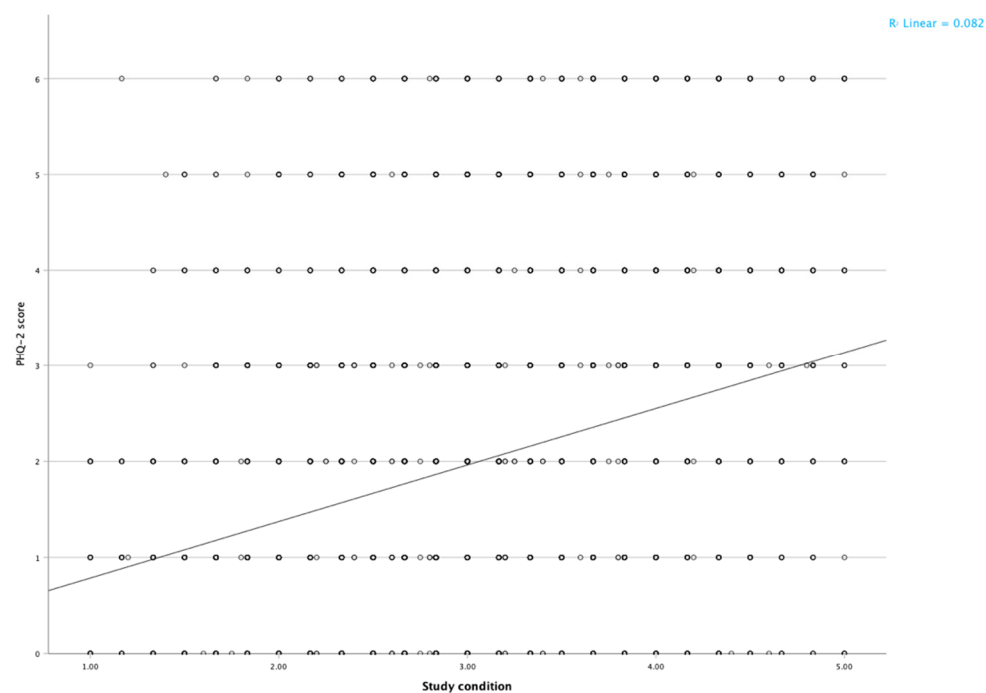

Figure S2.2: Linearity between the PHQ-2 score and study condition score

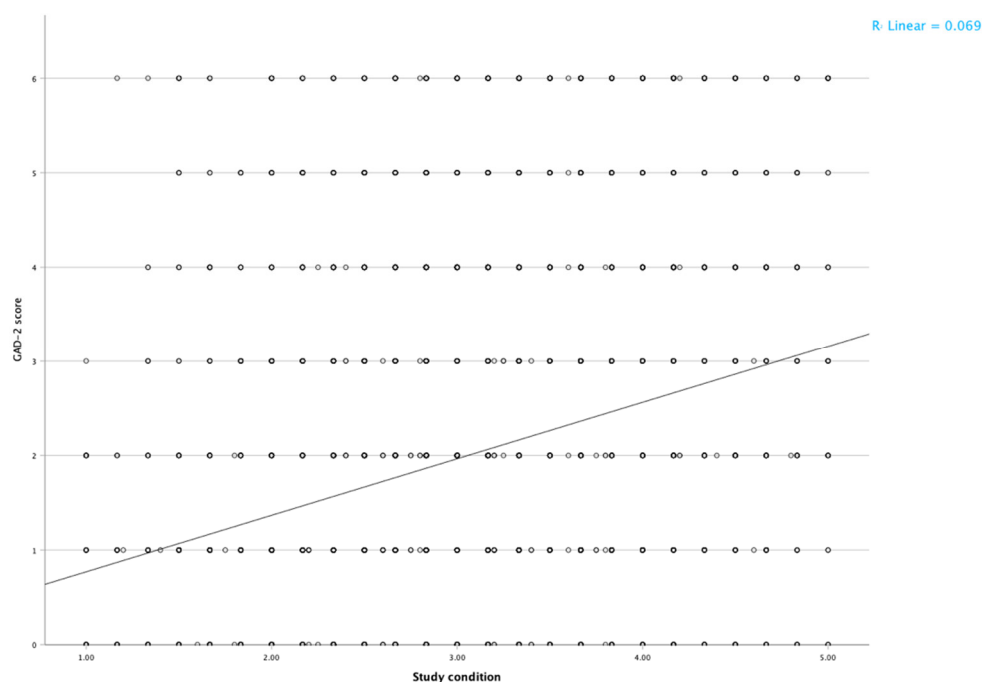

Figure S2.3: Linearity between the GAD-2 score and study condition score

Table S2.1: Test for multicollinearity between the dependent variables (CES-D 8, PHQ-2, GAD-2) and all independent variables

|                                                | CES-D 8   |       | PHQ-2     |       | GAD-2     |       |
|------------------------------------------------|-----------|-------|-----------|-------|-----------|-------|
|                                                | Tolerance | VIF   | Tolerance | VIF   | Tolerance | VIF   |
| <b>Problematic study conditions (metric)</b>   | 0.957     | 1.04  | 0.957     | 1.044 | 0.957     | 1.044 |
| <b>Utilisation of student counselling</b>      | 0.980     | 1.02  | 0.980     | 1.020 | 0.980     | 1.020 |
| <b>Anyone to discuss intimate matters with</b> | 0.932     | 1.07  | 0.930     | 1.075 | 0.930     | 1.074 |
| <b>Age</b>                                     | 0.856     | 1.168 | 0.856     | 1.167 | 0.856     | 1.167 |
| <b>Residency status in Germany</b>             | 0.930     | 1.075 | 0.931     | 1.073 | 0.931     | 1.073 |
| <b>Living situation</b>                        | 0.949     | 1.053 | 0.951     | 1.051 | 0.951     | 1.051 |
| <b>Male</b>                                    | 0.968     | 1.053 | 0.965     | 1.035 | 0.965     | 1.035 |
| <b>Diverse</b>                                 | 0.992     | 1.008 | 0.991     | 1.008 | 0.991     | 1.008 |
| <b>Single</b>                                  | 0.872     | 1.147 | 0.872     | 1.146 | 0.872     | 1.146 |
| <b>It's complicated</b>                        | 0.951     | 1.050 | 0.951     | 1.050 | 0.951     | 1.050 |
| <b>Master programme</b>                        | 0.788     | 1.270 | 0.787     | 1.270 | 0.787     | 1.269 |
| <b>Examination programme</b>                   | 0.848     | 1.180 | 0.847     | 1.179 | 0.848     | 1.179 |
| <b>PhD programme</b>                           | 0.887     | 1.127 | 0.887     | 1.126 | 0.887     | 1.126 |

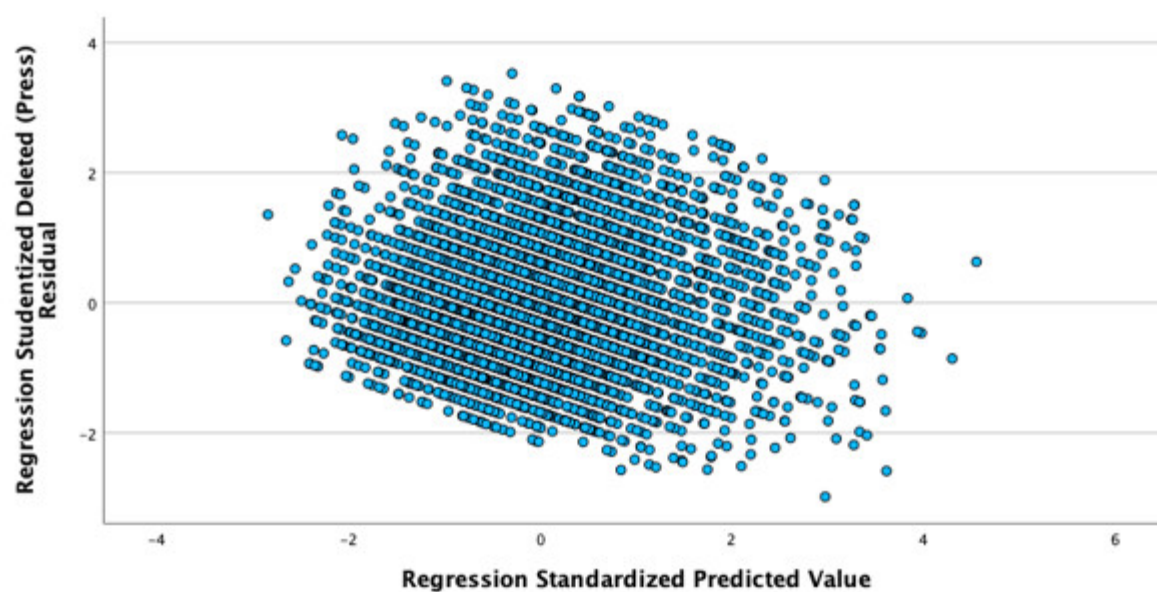

Figure S2.4: Homoscedasticity between CES-D 8 and all independent variables

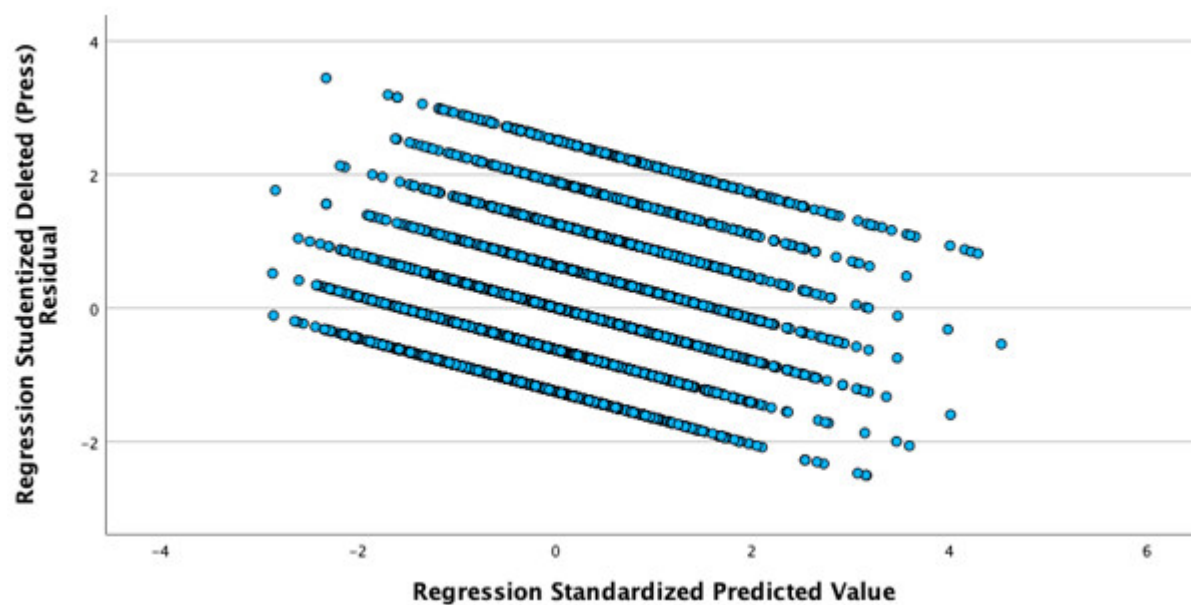

Figure S2.5: Homoscedasticity between PHQ-2 and all independent variables

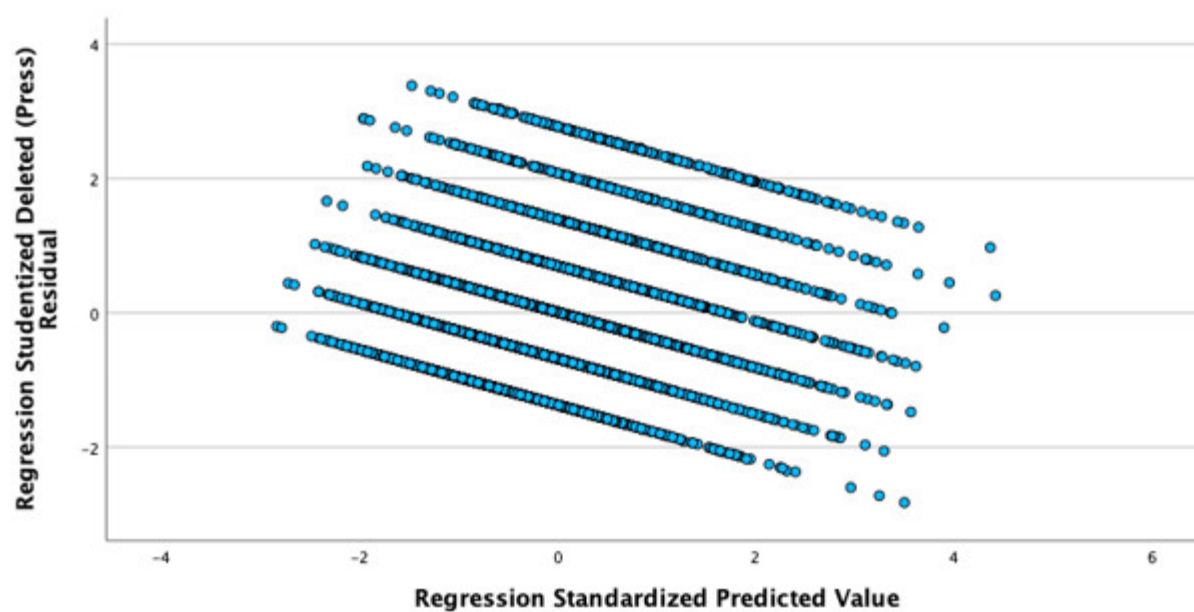

Figure S2.6: Homoscedasticity between the GAD-2 and all independent variables

Table S2.2: Kolmogorov-Smirnov test to check normal distributed residuals between the dependent variables (CES-D 8, PHQ-2, GAD-2) and all independent variables

|                          | Kolmogorov-Smirnov test |                 |                 |
|--------------------------|-------------------------|-----------------|-----------------|
|                          | CES-D 8 (p-value)       | PHQ-2 (p-value) | GAD-2 (p-value) |
| Unstandardized residuals | <0.001                  | <0.001          | <0.001          |
